# Supplementary material for: Applied Proteomics in ‘One Health’
Source: MDPI journal article supplement (doi:10.3390/proteomes9030031), 2021-06-30

# Applied Proteomics in ‘One Health’

Eleni I. Katsarou, Charalambos Billinis, Dimitrios Galamatis, George C. Fthenakis, George Th. Tsangaris, and Angeliki I. Katsafadou

**Table S1.** Proteomics studies with a significance in the ‘One Health’ context, which were performed in animal samples, reviewed in the text of the paper.

| Pathogen                                       | Animal species | Type of sample(s)  | Proteomics methodologies applied <sup>1</sup> | Summary of main findings                                      | Reference                    |
|------------------------------------------------|----------------|--------------------|-----------------------------------------------|---------------------------------------------------------------|------------------------------|
| Prion protein                                  | Sheep          | Blood serum        | SELDI-TOF MS                                  | Potential biomarkers                                          | Batxelli-Molina et al. 2010  |
|                                                | Sheep          | Brain tissue       | MALDI-TOF MS                                  | Proteins associated with pathogenesis                         | Morel et al. 2007            |
|                                                | Sheep          | Brain tissue       | 2-DE, LC-MS/MS                                | Proteins associated with pathogenesis                         | Petrakis et al. 2009         |
|                                                | Hamster        | Brain tissue       | 2-DE, MALDI-TOF, LC-MS/MS                     | Proteins associated with pathogenesis                         | Giorgi et al. 2009           |
|                                                | Mouse          | Brain tissue       | SDS PAGE, LC-MS/MS                            | Potential biomarkers                                          | Graham et al. 2011           |
| Rabies Virus                                   | Dog            | Brain tissue       | 2-DE, Q-TOF MS, MS/MS                         | Proteins associated with pathogenesis<br>Protein networks     | Thanomsridetchai et al. 2011 |
|                                                | Dog            | Spinal cord tissue | 2-DE, Q-TOF MS, MS/MS                         | Proteins associated with pathogenesis<br>Protein networks     | Thanomsridetchai et al. 2011 |
|                                                | Dog            | Brain tissue       | 2-DIGE                                        | Potential biomarkers                                          | Kasempimolporn et al. 2014   |
|                                                | Cat            | Brain tissue       | 2-DIGE                                        | Potential biomarkers                                          | Kasempimolporn et al. 2014   |
|                                                | Mouse          | Neuronal tissue    | 2-DE, MS                                      | Potential biomarkers                                          | Mehta et al. 2016            |
| Influenza Virus                                | Poultry        | Trachea            | 2-DIGE, MALDI-TOF MS/MS                       | Proteins associated with pathogenesis                         | Sun et al. 2014              |
|                                                | Poultry        | Brain tissue       | 2-DE, MALDI-TOF MS/MS                         | Proteins associated with pathogenesis                         | Zou et al. 2010              |
| <i>M. avium</i> subsp. <i>paratuberculosis</i> | Sheep          | Blood serum        | 2-DE, MALDI-TOF MS                            | Proteins associated with pathogenesis                         | Hughes et al. 2008           |
|                                                | Sheep          | Intestinal tissue  | 2-DE, MALDI TOF MS                            | Proteins associated with pathogenesis                         | Hughes et al. 2007           |
|                                                | Sheep          | Blood serum        | SELDI-TOF MS                                  | Proteins associated with pathogenesis                         | Zhong et al. 2011            |
| <i>M. bovis</i>                                | Cattle         | Blood serum        | iTRAQ, LC MS/MS                               | Potential biomarkers                                          | Seth et al. 2009             |
|                                                | Cattle         | Blood serum        | iTRAQ                                         | Potential biomarkers                                          | Lamont et al. 2014           |
|                                                | Cattle         | Blood serum        | RP-LC-MS/MS                                   | Proteins associated with pathogenesis                         | Lopez et al. 2018            |
| <i>B. abortus</i>                              | Cattle         | Blood serum        | 1-DE SDS PAGE, 2-DE                           | Proteins associated with pathogenesis<br>Potential biomarkers | Pajuaba et al. 2012          |
| <i>B. melitensis</i>                           | Sheep          | Blood serum        | LC-MS                                         | Potential biomarkers                                          | Mavromatti 2012              |

|                                        |          |                       |                              |                                                               |                            |
|----------------------------------------|----------|-----------------------|------------------------------|---------------------------------------------------------------|----------------------------|
| <i>B. mallei</i>                       | Horse    | Blood serum           | 2-DE, MALDI-TOF/TOF          | Potential biomarkers                                          | Dohre et al. 2017          |
|                                        | Horse    | Blood serum           | SDS PAGE                     | Potential biomarkers                                          | Yazdansetad et al. 2019    |
| <i>C. jejuni</i>                       | Sheep    | Blood serum           | 2-DE, MALDI-TOF              | Proteins associated with pathogenesis<br>Potential biomarkers | Wu et al. 2014             |
|                                        | Poultry  | Intestinal tissue     | iTRAQ, 2-DE, LC MS/MS        | Proteins associated with pathogenesis<br>Potential biomarkers | Asakura et al. 2016        |
|                                        | Poultry  | Intestinal tissue     | 2-DIGE, nano LC-MS/MS        | Proteins associated with pathogenesis                         | O'Reilly et al. 2017       |
|                                        | Poultry  | Skin                  | LC MS                        | Proteins associated with pathogenesis                         | Taniguchi et al. 2021      |
| <i>S. enterica</i> ser.<br>Typhimurium | Pig      | Intestinal tissue     | 2-DIGE                       | Proteins associated with pathogenesis                         | Arce et al. 2014           |
|                                        | Pig      | Lymph node            | 2-DIGE, MALDI TOF/TOF        | Proteins associated with pathogenesis                         | Martins et al. 2012        |
|                                        | Pig      | Intestinal tissue     | iTRAQ, LC MS/MS              | Proteins associated with pathogenesis                         | Collado-Romero et al. 2015 |
|                                        | Pig      | Intestinal tissue     | 2-DE, MALDI-TOF              | Proteins associated with pathogenesis                         | Collado-Romero et al. 2012 |
| <i>S. enterica</i> ser.<br>Enteritidis | Poultry  | Blood serum           | TMT, LC MS/MS                | Proteins associated with pathogenesis<br>Potential biomarkers | Polansky et al. 2018       |
|                                        | Poultry  | Liver tissue          | TMT, LC MS/MS                | Proteins associated with pathogenesis<br>Potential biomarkers | Polansky et al. 2018       |
|                                        | Poultry  | Spleen tissue         | LC MS/MS                     | Proteins associated with pathogenesis                         | Sekelova et al. 2017       |
| <i>L. copenhageni</i>                  | Rats     | Urine                 | 2-DIGE, nano LC-MS/MS        | Potential biomarkers                                          | Nally et al. 2011          |
|                                        | Rats     | Urine                 | 1-DE SDS PAGE, 2-DE          | Proteins associated with pathogenesis                         | Monahan et al. 2008        |
| <i>L. interrogans</i>                  | Hamsters | Kidney & liver tissue | 2-DE, MALDI-TOF              | Proteins associated with pathogenesis                         | Vieira et al. 2009         |
| <i>M. haemolytica</i>                  | Sheep    | Blood serum           | 2-DE, MALDI-TOF MS           | Proteins associated with pathogenesis                         | Katsafadou et al. 2019a    |
|                                        | Sheep    | Milk                  | 2-DE, MALDI-TOF MS           | Proteins associated with pathogenesis                         | Katsafadou et al. 2019a    |
|                                        | Sheep    | Milk                  | 2-DE, MALDI-TOF MS           | Potential biomarkers                                          | Katsafadou et al. 2019b    |
| <i>M. agalactiae</i>                   | Sheep    | Milk                  | 2-DIGE, SDS PAGE, GeLC-MS/MS | Proteins associated with pathogenesis<br>Potential biomarkers | Addis et al. 2011          |
| <i>S. aureus</i>                       | Sheep    | Blood serum           | SDS PAGE                     | Proteins associated with pathogenesis                         | Le Maréchal et al. 2009    |
|                                        | Cattle   | Milk                  | CE MS, LC MS/MS              | Potential biomarkers                                          | Mansor et al. 2013         |
| <i>S. uberis</i>                       | Sheep    | Milk                  | 2-DIGE, SDS PAGE             | Proteins associated with pathogenesis<br>Potential biomarkers | Addis et al. 2013          |
|                                        | Sheep    | Milk                  | LC-MS/MS                     | Proteins associated with pathogenesis                         | Pisanu et al. 2015         |
|                                        | Sheep    | Mammary tissue        | LC-MS/MS                     | Proteins associated with pathogenesis                         | Pisanu et al. 2015         |
| <i>L. infantum</i>                     | Dog      | Blood serum           | RP-LC-MS/MS                  | Potential biomarkers                                          | Franco-Martinez (2020)     |
| <i>T. spiralis</i>                     | Pig      | Blood serum           | 2-DE, MALDI-TOF              | Proteins associated with pathogenesis<br>Potential biomarkers | Gondek et al. (2020)       |

<sup>1</sup> 1-DE SDS-PAGE: One-Dimensional Electrophoresis Sodium Dodecyl Sulphate–PolyAcrylamide Gel Electrophoresis; 2-DE: Two-Dimensional Electrophoresis; 2-DIGE: Two-Dimensional Difference Gel Electrophoresis; CE: Capillary Electrophoresis Mass Spectrometry; GeLC-MS/MS: Gel electrophoresis Liquid Chromatography-Mass Spectrometry/Mass Spectrometry; iTRAQ: isobaric Tag for Relative and Absolute Quantitation; LC-MS: Liquid Chromatography-Mass Spectrometry; LC-MS/MS: Liquid Chromatography-Mass Spectrometry/Mass Spectrometry; MALDI TOF: Matrix-Assisted Laser Desorption/Ionization – Time Of Flight; MALDI TOF/TOF: Matrix-Assisted Laser Desorption/Ionization – Time Of Flight/Time Of Flight; MS: Mass Spectrometry; Q-TOF MS: Quadrupole-Time Of Flight Mass Spectrometry; RP-LC-MS/MS: Reverse Phase-Liquid Chromatography-Mass Spectrometry/Mass Spectrometry; SELDI-TOF: Surface-Enhanced Laser Desorption/Ionization – Time of Flight; SDS-PAGE: Sodium Dodecyl Sulphate–PolyAcrylamide Gel Electrophoresis; TMT: Tandem Mass Tags.

## References

- Addis, M.F.; Pisanu, S.; Ghisaura, S.; Pagnozzi, D.; Marogna, G.; Tanca, A.; Biosa, G.; Cacciotto, C.; Alberti, A.; Pittau, M.; Roggio, T.; Uzzau, S. Proteomics and pathway analyses of the milk fat globule in sheep naturally infected by *Mycoplasma agalactiae* provide indications of the in vivo response of the mammary epithelium to bacterial infection. *Infect. Immun.* **2011**, *79*, 3833–3845.
- Arce, C.; Lucena, C.; Moreno, A.; Garrido, J.J. Proteomic analysis of intestinal mucosa responses to *Salmonella enterica* serovar Typhimurium in naturally infected pig. *Comp. Immunol. Microbiol. Infect. Dis.* **2014**, *37*, 59–67.
- Asakura, H.; Kawamoto, K.; Murakami, S.; Tachibana, M.; Kurazono, H.; Makino, S.; Yamamoto, S.; Igimi, S. *Ex vivo* proteomics of *Campylobacter jejuni* 81-176 reveal that FabG affects fatty acid composition to alter bacterial growth fitness in the chicken gut. *Res. Microbiol.* **2016**, *167*, 63–71.
- Batxelli-Molina, I.; Salvetat, N.; Andréoletti, O.; Guerrier, L.; Vicat, G.; Molina, F.; Mourton-Gilles, C. Ovine serum biomarkers of early and late phase scrapie. *Vet. Res.* **2010**, *6*, 49.
- Collado-Romero, M.; Aguilar, C.; Arce, C.; Lucena, C.; Codrea, M. C.; Morera, L.; Bendixen, E.; Moreno, Á.; Garrido, J.J. Quantitative proteomics and bioinformatic analysis provide new insight into the dynamic response of porcine intestine to *Salmonella* Typhimurium. *Fr. Cell. Infect. Microbiol.* **2015**, *5*, 64.
- Dohre, S.K.; Kamthan, A.; Singh, S.; Alam, S.I.; Kumar, S. Identification of a new diagnostic antigen for glanders using immunoproteome analysis. *Comp. Immunol. Microbiol. Infect. Dis.* **2017**, *53*, 26–32.
- Franco-Martínez, L.; Villar, M.; Tvarijonaviciute, A.; Escibano, D.; Bernal, L. J.; Cerón, J.J.; Thomas, M.; Mateos-Hernández, L.; Tecles, F.; de la Fuente, J.; López, M.C.; Martínez-Subiela, S. Serum proteome of dogs at subclinical and clinical onset of canine leishmaniosis. *Transbound. Emerg. Dis.* **2020**, *67*, 318–327.
- Giorgi, A.; Di Francesco, L.; Principe, S.; Mignogna, G.; Sennels, L.; Mancone, C.; Alonzi, T.; Sbriccoli, M.; De Pascalis, A.; Rappsilber, J.; Cardone, F.; Pocchiari, M.; Maras, B.; Schininà, M. E. Proteomic profiling of PrP27-30-enriched preparations extracted from the brain of hamsters with experimental scrapie. *Proteomics* **2009**, *9*, 3802–3814.
- Gondek, M.; Herosimczyk, A.; Knysz, P.; Ożgo, M.; Lepczyński, A.; Szkucik, K. Comparative Proteomic Analysis of serum from pigs experimentally infected with *Trichinella spiralis*, *Trichinella britovi*, and *Trichinella pseudospiralis*. *Pathogens* **2020**, *9*, 55.
- Graham, J.F.; Kurian, D.; Agarwal, S.; Toovey, L.; Hunt, L.; Kirby, L.; Pinheiro, T.J.; Banner, S.J.; Gill, A.C. Na<sup>+</sup>/K<sup>+</sup>-ATPase is present in scrapie-associated fibrils, modulates PrP misfolding *in vitro* and links PrP function and dysfunction. *PloS One* **2011**, *6*, e26813.
- Hughes, V.; Smith, S.; Garcia-Sanchez, A.; Sales, J.; Stevenson, K. Proteomic comparison of *Mycobacterium avium* subspecies *paratuberculosis* grown in vitro and isolated from clinical cases of ovine paratuberculosis. *Microbiology* **2007**, *153*, 196–205.
- Hughes, V.; Bannantine, J.P.; Denham, S.; Smith, S.; Garcia-Sanchez, A.; Sales, J.; Paustian, M.L.; Mclean, K.; Stevenson, K. Immunogenicity of proteome-determined *Mycobacterium avium* subsp. *paratuberculosis*-specific proteins in sheep with paratuberculosis. *Clin. Vaccine Immunol.* **2008**, *15*, 1824–1833.
- Kasempimolporn, S.; Lumlertdacha, B.; Chulasugandha, P.; Boonchang, S.; Sitprija, V. Alterations in brain cerebral cortex proteome of rabies-infected cat. *Southeast Asian J. Trop. Med. Public Health* **2014**, *45*, 808–815.
- Katsafadou, A.I.; Tsangaris, G.T.; Anagnostopoulos, A.K.; Billinis, C.; Barbogianni, M.S.; Vasileiou, N.G.C.; Spanos, S.A.; Mavrogianni, V.S.; Fthenakis, G.C. Differential quantitative proteomics study of experimental *Mannheimia haemolytica* mastitis in sheep. *J. Proteom.* **2019**, *205*, 103393.

- Katsafadou, A.I.; Tsangaris, G.T.; Vasileiou, N.G.C.; Ioannidi, K.S.; Anagnostopoulos, A.K.; Billinis, C.; Fragkou, I.A.; Papadopoulos, I.; Mavrogianni, V.S.; Michael, C.K.; Addis, F.; Fthenakis, G.C. Detection of cathelicidin-1 in the milk as an early indicator of mastitis in ewes. *Pathogens* **2019**, *8*, 270.
- Lamont, E.A.; Janagama, H.K.; Ribeiro-Lima, J.; Vulchanova, L.; Seth, M.; Yang, M.; Kurmi, K.; Waters, W.R.; Thacker, T.; Sreevatsan, S. Circulating *Mycobacterium bovis* peptides and host response proteins as biomarkers for unambiguous detection of subclinical infection. *J. Clin. Microbiol.* **2014**, *52*, 536–543.
- Le Maréchal, C.; Jan, G.; Even, S.; McCulloch, J. A.; Azevedo, V.; Thiéry, R.; Vautor, E.; Le Loir, Y. Development of serological proteome analysis of mastitis by *Staphylococcus aureus* in ewes. *J. Microbiol. Methods* **2009**, *79*, 131–136.
- Lopez, V.; van der Heijden, E.; Villar, M.; Michel, A.; Alberdi, P.; Gortázar, C.; Rutten, V.; de la Fuente, J. Comparative proteomics identified immune response proteins involved in response to vaccination with heat-inactivated *Mycobacterium bovis* and mycobacterial challenge in cattle. *Vet. Immunol. Immunopathol.* **2018**, *206*, 54–64.
- Mansor, R.; Mullen, W.; Albalat, A.; Zerefos, P.; Mischak, H.; Barrett, D.C.; Biggs, A.; Eckersall, P.D. A peptidomic approach to biomarker discovery for bovine mastitis. *J. Proteom.* **2013**, *85*, 89–98.
- Martins, R.P.; Collado-Romero, M.; Martínez-Gomáriz, M.; Carvajal, A.; Gil, C.; Lucena, C.; Moreno, A.; Garrido, J.J. Proteomic analysis of porcine mesenteric lymph-nodes after *Salmonella typhimurium* infection. *J. Proteom.* **2012**, *75*, 4457–4470.
- Mavromati J (2012). Brucellosis and proteomics: an approach in Albania. In *Farm animal proteomics 2012*, Proceedings of the 3rd Managing Committee Meeting and 2nd Meeting of Working Groups 1, 2 & 3 of COST Action FA1002, Algarve, Portugal, 27 March 2012; Rodrigues P, Eckersall D, de Almeida A, Eds.; Wageningen Academic Publishers: Wageningen, The Netherlands, 2012, pp. 80–83.
- Mehta, S.; Sreenivasamurthy, S.; Banerjee, S.; Mukherjee, S.; Prasad, K.; Chowdhary, A. 2016. Pathway analysis of proteomics profiles in rabies infection: towards future biomarkers? *Omics J. Integrativ. Biol.* **2016**, *20*, 97–109.
- Monahan, A.M.; Callanan, J.J.; Nally, J.E. Proteomic analysis of *Leptospira interrogans* shed in urine of chronically infected hosts. *Infect. Immun.* **2008**, *76*, 4952–4958.
- Morel, N.; Andreoletti, O.; Grassi, J.; Clement, G. Absolute and relative quantification of sheep brain prion protein (*PrP*) allelic variants by matrix-assisted laser desorption/ionisation time-of-flight mass spectrometry. *Rapid Comm. Mass Spectrom.* **2007**, *21*, 4093–4100.
- Nally, J.E.; Monahan, A.M.; Miller, I.S.; Bonilla-Santiago, R.; Souda, P.; Whitelegge, J.P. Comparative proteomic analysis of differentially expressed proteins in the urine of reservoir hosts of leptospirosis. *PLoS One* **2011**, *6*, e26046.
- O'Reilly, E.L.; Burchmore, R.J.; Sparks, N.H.; Eckersall, P.D. The effect of microbial challenge on the intestinal proteome of broiler chickens. *Proteome Sci.* **2017**, *15*, 10.
- Pajuaba, A.C.; Silva, D.A.; Almeida, K.C.; Cunha-Junior, J.P.; Pirovani, C.P.; Camillo, L.R.; Mineo, J.R. Immunoproteomics of *Brucella abortus* reveals differential antibody profiles between S19-vaccinated and naturally infected cattle. *Proteomics* **2012**, *12*, 820–831.
- Petrakis, S.; Malinowska, A.; Dadlez, M.; Sklaviadis, T. Identification of proteins co-purifying with scrapie infectivity. *J. Proteom.* **2009**, *72*, 690–694.
- Pisanu, S.; Cubeddu, T.; Pagnozzi, D.; Rocca, S.; Cacciotto, C.; Alberti, A.; Marogna, G.; Uzzau, S.; Addis, M. F. Neutrophil extracellular traps in sheep mastitis. *Vet. Res.* **2015**, *46*, 59.
- Polansky, O.; Seidlerova, Z.; Faldynova, M.; Sisak, F.; Rychlik, I. Protein expression in the liver and blood serum in chickens in response to *Salmonella* Enteritidis infection. *Vet. Immunol. Immunopathol.* **2018**, *205*, 10–16.
- Sekelova, Z.; Polansky, O.; Stepanova, H.; Fedr, R.; Faldynova, M.; Rychlik, I.; Vlasatikova, L. Different roles of CD4, CD8 and  $\gamma\delta$  T-lymphocytes in naive and vaccinated chickens during *Salmonella enteritidis* infection. *Proteomics* **2017**, *17*, 1700073.
- Seth, M.; Lamont, E.A.; Janagama, H.K.; Widdel, A.; Vulchanova, L.; Stabel, J.R.; Waters, W.R.; Palmer, M.V.; Sreevatsan, S. Biomarker discovery in subclinical mycobacterial infections of cattle. *PLoS One* **2009**, *4*, e5478.
- Sun, J.F.; Han, Z.X.; Shao, Y.H.; Cao, Z.Z.; Kong, X.G.; Liu, S.W. Comparative proteome analysis of tracheal tissues in response to infectious bronchitis coronavirus, Newcastle disease virus, and avian influenza virus H9 subtype virus infection. *Proteomics* **2014**, *14*, 1403–1423.
- Taniguchi, T.; Ohki, M.; Urata, A.; Ohshiro, S.; Tarigan, E.; Kiatsomphob, S.; Vetchapitak, T.; Sato, H.; Misawa, N. Detection and identification of adhesins involved in adhesion of *Campylobacter jejuni* to chicken skin. *Int. J. Food Microbiol.* **2021**, *337*, 108929.

- Thanomsridetchai, N.; Singhto, N.; Tepsumethanon, V.; Shuangshoti, S.; Wacharapluesadee, S.; Sinchaikul, S.; Chen, S. T.; Hemachudha, T.; Thongboonkerd, V. Comprehensive proteome analysis of hippocampus, brainstem, and spinal cord from paralytic and furious dogs naturally infected with rabies. *J. Proteome Res.* **2011**, *10*, 4911–4924.
- Vieira, M.L.; Pimenta, D.C.; de Moraes, Z.M.; Vasconcellos, S.A.; Nascimento, A.L. Proteome analysis of *Leptospira interrogans* virulent strain. *Open Microbiol. J.* **2009**, *3*, 69–74.
- Wu, Z.; Sahin, O.; Wang, F.; Zhang, Q. Proteomic identification of immunodominant membrane-related antigens in *Campylobacter jejuni* associated with sheep abortion. *J. Proteom.* **2014**, *99*, 111–122.
- Yazdanesad, S.; Mosavari, N.; Tadayon, K.; Mehregan, I. Development of an immunoblotting assay for serodiagnosis of *Burkholderia mallei* infection: the whole-cell proteome-based paradigm. *Iran J. Microbiol.* **2019**, *11*, 232–238.
- Zhong, L.; Taylor, D.; Begg, D.J.; Whittington, R.J. Biomarker discovery for ovine paratuberculosis (Johne's disease) by proteomic serum profiling. *Comp. Immunol. Microbiol. Infect. Dis.* **2011**, *34*, 315–326.
- Zou, W.; Ke, J.; Zhang, A.; Zhou, M.; Liao, Y.; Zhu, J.; Zhou, H.; Tu, J.; Chen, H.; Jin, M. Proteomics analysis of differential expression of chicken brain tissue proteins in response to the neurovirulent H5N1 avian influenza virus infection. *J. Proteome Res.* **2010**, *9*, 3789–3798.

**Table S2.** Summary of the milestones COVID-19 research by use of proteomics methodologies.

| Date         | Proteomics methodologies applied <sup>1</sup>                                                                 | Summary of main findings                                                                                                                                                                                                                                                                                                                                                                                                 | Reference                |
|--------------|---------------------------------------------------------------------------------------------------------------|--------------------------------------------------------------------------------------------------------------------------------------------------------------------------------------------------------------------------------------------------------------------------------------------------------------------------------------------------------------------------------------------------------------------------|--------------------------|
| 24 Mar. 2020 | Bioinformatics methodologies<br>(protein sequence alignment of the full-length coronavirus spike proteins)    | Assembly of draft genome of the causal virus, with alignment of the spike surface glycoprotein receptor binding domain and final results indicating the pangolin as a missing link in the transmission of the virus to humans                                                                                                                                                                                            | Zhang et al. 2020        |
| 30 Apr. 2020 | nano LC-MS/MS                                                                                                 | Interactomics study with viral proteins individually produced in host cells                                                                                                                                                                                                                                                                                                                                              | Gordon, Jang et al. 2020 |
| 14 May. 2020 | LC-MS/MS                                                                                                      | Identification of two protein clusters in the blood of COVID-19 patients (first: proteins downregulated during infection, mainly involved in cholesterol metabolism; second: proteins upregulated after infection, which included RNA-modifying proteins), which could be used for potential therapeutic interventions                                                                                                   | Bojkova et al. 2020      |
| 27 May. 2020 | nano LC-MS/MS                                                                                                 | Presentation of 14 peptides from the nucleoprotein, spike and membrane glycoprotein structural proteins for development of diagnostic techniques                                                                                                                                                                                                                                                                         | Gouveia et al. 2020      |
| 22 Jun. 2020 | nano-HPLC-MS/MS                                                                                               | Development of a technique for detection of proteins of the virus from gargle solution samples of COVID-19 patients                                                                                                                                                                                                                                                                                                      | Ihling et al. 2020       |
| 23 Jun. 2020 | Bioinformatics methodologies<br>(727 unique protein sequences categorized by each of the 10 SARS-CoV-2 genes) | Reporting of peptides of the causal virus for potential use in multi-epitope vaccines                                                                                                                                                                                                                                                                                                                                    | Yarmarkovich et al. 2020 |
| 9 Jul. 2020  | LC-MS/MS                                                                                                      | Identification of changes in the blood serum of COVID-19 patients, showing dysregulation of macrophages, platelet degranulation, complement system pathways, and massive metabolic suppression, with protein and metabolite changes, for use in selection of potential biomarkers                                                                                                                                        | Shen et al. 2020         |
| 17 Jul. 2020 | LC-MS/MS                                                                                                      | Description of changes in the expression of three structural proteins and three non-structural proteins of the causal virus, consequently to <i>in vitro</i> infection of cell culture                                                                                                                                                                                                                                   | Grenga et al. 2020       |
| 21 Jul. 2021 | TMT-labeled LC-MS/MS                                                                                          | Presence of increased IL-6 and IL-8 in PBMCs from patients with severe disease and the functional annotation of differentially expressed proteins, implicating pathways involved in neutrophil activation, T cell receptor signaling and the coagulation cascade                                                                                                                                                         | Li, Guo et al. 2021      |
| 25 Jul. 2020 | Bioinformatics methodologies<br>(analysis of data from proteomic platforms)                                   | Presentation of novel information on the presence of intrinsic disorder at the cleavage sites of replicase polyprotein 1ab of SARS CoVs                                                                                                                                                                                                                                                                                  | Giri et al. 2021         |
| 27 Jul. 2020 | LC-MS                                                                                                         | Identification of 27 potential biomarkers for prediction of the severity of COVID-19                                                                                                                                                                                                                                                                                                                                     | Messner et al. 2020      |
| 6 Aug. 2020  | nano LC-MS/MS                                                                                                 | Rewiring of phosphorylation on host and viral proteins; promotion of casein kinase II (CK2) and p38 MAPK activation, production of diverse cytokines and shutdown of mitotic kinases by the causal virus, leading in cell cycle arrest; stimulation of marked induction of CK2-containing filopodial protrusions possessing budding viral particles; identification of drugs and compounds for potential therapeutic use | Bouhaddou et al. 2020    |

|              |                                                                             |                                                                                                                                                                                                                                                                                                                                                                     |                           |
|--------------|-----------------------------------------------------------------------------|---------------------------------------------------------------------------------------------------------------------------------------------------------------------------------------------------------------------------------------------------------------------------------------------------------------------------------------------------------------------|---------------------------|
| 14 Aug. 2020 | nano HPLC-MS/MS                                                             | Identification of dysregulation in various coagulation factors in COVID-19 patients, accompanied by increased levels of an-ti-fibrinolytic components, among which various serine protease inhibitors                                                                                                                                                               | D'Alessandro et al. 2020  |
| 10 Sep. 2020 | Bioinformatics methodologies<br>(analysis of data from proteomic platforms) | Elucidation of the pathophysiology of the 'cytokine storm', with the finding of a dominant hyperinflammatory milieu in the circulation and vascular endothelial damage markers in patients                                                                                                                                                                          | Sims et al. 2021          |
| 10 Sep. 2020 | LC-MS/MS                                                                    | Identification of peptides significantly associated with SARS-CoV-2 infection and development of a multi-marker urinary peptide-based test, for enabling potential prognosis of outcomes in COVID-19 patients                                                                                                                                                       | Wendt et al. 2020         |
| 1 Oct. 2020  | LC-MS/MS                                                                    | Identification of viral protein phosphorylation, phosphorylation-driven host cell signaling changes and activation of growth factor receptor (GFR) signaling and downstream pathways are activated; description of host cell signaling events upon infection and identification of GFR signaling as a central pathway essential for replication of the causal virus | Klann et al. 2020         |
| 15 Oct. 2020 | nano LC-MS/MS                                                               | Identification of differentially expressed proteins involved in cellular metabolism, blood coagulation, immune response, angiogenesis and cell microenvironment regulation, which outlined the molecular pathological features of the lung response during the infection                                                                                            | Leng et al. 2020          |
| 20 Oct. 2020 | LC-MS/MS                                                                    | Validation of transcriptome findings from colonic samples and identification of key proteins (e.g., SARS-CoV-2 entry-associated protease cathepsins B and L, inflammatory response modulator S100A8/A9) with increased expression in patients with severe disease                                                                                                   | Wu et al. 2020            |
| 24 Oct. 2020 | LC-MS/MS                                                                    | Identification of 358 differentially expressed proteins in bronchoalveolar lavage fluid samples from patients with COVID-19, identified as biomarkers or therapeutic candidates for the disease                                                                                                                                                                     | Zeng et al. 2020          |
| 17 Nov. 2020 | LC-MS/MS                                                                    | Identification of 11 proteins as biomarkers and a set of biomarker combinations, validated by an independent cohort for prediction of the outcomes of the disease, all these mediating various pathophysiological pathways (e.g., immune or inflammatory responses, platelet degranulation and coagulation, metabolism)                                             | Shu et al. 2020           |
| 2 Dec. 2020  | LC-MS/MS                                                                    | Profiling of the virus-host protein-protein interactions of two hCoV nonstructural proteins (nsps) critical for viral replication                                                                                                                                                                                                                                   | Davies et al. 2020        |
| 3 Dec. 2020  | LC-MS/MS                                                                    | Development and validation of an assay for detection of nucleoprotein peptides of the virus nasopharyngeal and oropharyngeal swabs                                                                                                                                                                                                                                  | Cardozo et al. 2020       |
| 4 Dec. 2020  | LC-MS/MS                                                                    | Comparative viral-human protein-protein interaction and viral protein localization analyses for SARS-CoV-2, SARS-CoV-1 and MERS-CoV viruses and functional genetic screening for identification of host factors that functionally impinge on viral proliferation                                                                                                    | Gordon, Hiatt et al. 2020 |
| 21 Dec. 2020 | LC-MS/MS                                                                    | Identification of 104 human proteins directly and specifically binding to SARS-CoV-2 RNAs in infected cells                                                                                                                                                                                                                                                         | Schmidt et al. 2020       |

|              |          |                                                                                                                                                                                                                                                                                                                                                                     |                          |
|--------------|----------|---------------------------------------------------------------------------------------------------------------------------------------------------------------------------------------------------------------------------------------------------------------------------------------------------------------------------------------------------------------------|--------------------------|
| 29 Dec. 2020 | LC-MS/MS | Identification of 91 differentially expressed proteins in plasma, depending on the severity of the disease and of 76 proteins as prognostic biomarker candidates, elucidation of the role of neutrophil activation, complement activation, platelet function and T cell suppression                                                                                 | Park et al. 2020         |
| 9 Jan. 2021  | LC-MS/MS | Upregulation of cathepsin L1 being upregulated in lungs, identification of factors of dysregulation in hypoxia, angiogenesis, blood coagulation and fibrosis in multiple organs and presentation of evidence for testicular injuries in Covid-19 patients                                                                                                           | Nie et al. 2021          |
| 26 Jan. 2021 | LC-MS/MS | Development of a mass spectrometry assay for proteomics evaluation for SARS-CoV-2 in nasopharyngeal swab samples using common laboratory reagents                                                                                                                                                                                                                   | Saadi et al. 2021        |
| 8 Feb. 2021  | LC-MS/MS | Identification of 13 viral proteins from nasopharyngeal swabs, indicating modulation in immune response, especially involving neutrophil and IL12-mediated signaling                                                                                                                                                                                                | Tushir et al. 2021       |
| 2 Apr. 2021  | LC-MS/MS | Identification of a large dataset of SARS-CoV-2 derived peptide MS/MS spectra, specifically of two datasets with 39,650 peptides                                                                                                                                                                                                                                    | Li et al. 2021           |
| 12 Apr. 2021 | LC-MS/MS | Definition of the interactomes of SARS-CoV-2 and SARS-CoV viruses and their potential effects on the influence on the transcriptome, proteome, ubiquitinome and phosphoproteome of lung-derived human cell line                                                                                                                                                     | Stukalov et al. 2021     |
| 27 Apr. 2021 | LC-MS/MS | Identification of dysregulation in pathways associated with peptidase activity, regulated exocytosis, blood coagulation, complement activation, leucocyte activation involved in immune response and response to glucocorticoid biological processes in severe cases of SARS-CoV-2 infection and identification of potential biomarkers for severity of the disease | Suvarna et al. 2021      |
| 3 May 2021   | LC-MS    | Development of an assay for diagnosis of COVID-19, based on proteolytically digested proteins of the causal virus                                                                                                                                                                                                                                                   | Van Puyvelde et al. 2021 |
| 4 May. 2021  | LC-MS/MS | Identification of two potential prognostic biomarkers, involved in biological processes associated with humoral immune response, interferon signalling, acute phase response, lipid metabolism and platelet degranulation                                                                                                                                           | Lee et al. 2021          |
| 20 May. 2021 | LC-MS/MS | Evaluation of the heterogeneity of purified SARS-CoV-2 virus after culturing on cell line and identification of changes translated at the protein level                                                                                                                                                                                                             | Gallais et al. 2021      |

<sup>1</sup> HPLC-MS/MS: High Pressure Liquid Chromatography-Mass Spectrometry/Mass Spectrometry; LC-MS: Liquid Chromatography-Mass Spectrometry; LC-MS/MS: Liquid Chromatography-Mass Spectrometry/Mass Spectrometry; TMT: Tandem Mass Tags.

## References

- Bojkova, D.; Klann, K.; Koch, B.; Widera, M.; Krause D.; Ciesek, S.; Cinatl, J.; Münch, C. Proteomics of SARS-CoV-2-infected host cells reveals therapy targets. *Nature* **2020**, *583*, 469–472.
- Bouhaddou, M.; Memon, D.; Meyer, B.; White, K.M.; Rezelj, V.V.; Marrero, M.C.; Polacco, B.J.; Melnyk, J.E.; Ulferts, S.; Kaake, R.M. et al. The global phosphorylation landscape of SARS-CoV-2 infection. *Cell* **2020**, *182*, 685–712.e.19.
- Cardozo, K.H.M.; Lebkuchen, A.; Okai, G.G.; Schuch, R.A.; Viana, L.G.; Olive, A.N.; Lazari, C.D.; Fraga, A.M.; Granato, C.F.H.; Pintao, M.C.T. et al. Establishing a mass spectrometry-based system for rapid detection of SARS-CoV-2 in large clinical sample cohorts. *Nat. Comm.* **2020**, *11*, 6201.
- D'Alessandro, A.; Thomas, T.; Dzieciatkowska, M.; Hill, R.C.; Francis, R.O.; Hudson, K.E.; Zimring, J.C.; Hod, E.A.; Spitalnik, S.L.; Hansen, K.C. Serum proteomics in COVID-19 patients: altered coagulation and complement status as a function of IL-6 level. *J. Proteome Res.* **2020**, *19*, 4417–4427.

Davies, J.P.; Almasy, K.M.; McDonald, E.F.; Plate, L. 2020. Comparative multiplexed interactomics of SARS-CoV-2 and homologous coronavirus nonstructural proteins identifies unique and shared host-cell dependencies. *ACS Inf. Dis.* **2020**, *6*, 3174-3189.

Gallais, F.; Pible, O.; Gaillard, J.C.; Debroas, S.; Batina, H.; Ruat, S.; Sandron, F.; Delafoy, D.; Gerber, Z.; Olasso, R. et al. Heterogeneity of SARS-CoV-2 virus produced in cell culture revealed by shotgun proteomics and supported by genome sequencing. *Anal. Bioanal. Chem.* **2021**, in press. doi: 10.1007/s00216-021-03401-9.

Giri, R.; Bhardwaj, T.; Shegane, M.; Gehi, B.R.; Kumar, P.; Gadhave, K.; Oldfield, C.J.; Uversky, V.N. Understanding COVID-19 via comparative analysis of dark proteomes of SARS-CoV-2, human SARS and bat SARS-like coronaviruses. *Cell. Mol. Life Sci.* **2021**, *78*, 1655-1688.

Gordon, D.E.; Hiatt, J.; Bouhaddou, M.; Rezeli, V.V.; Ulferts, S.; Braberg, H.; Jureka, A.S.; Obernier, K.; Guo, J.Z.; Batra, J. et al. Comparative host-coronavirus protein interaction networks reveal pan-viral disease mechanisms. *Science* **2020**, *370*, 1181.

Gordon, D.E.; Jang, G.M.; Bouhaddou, M.; Xu, J.; Obernier, K.; White, K.M.; O'Meara, M.J.; Rezeli, V.V.; Guo, J.Z.; Swaney, D.L.; Tummino, T.A. et al. A SARS-CoV-2 protein interaction map reveals targets for drug repurposing. *Nature* **2020**, *583*, 459-468.

Gouveia, D.; Grenga, L.; Gaillard, J.C.; Gallais, F.; Bellanger, L.; Pible, O.; Armengaud, J. Shortlisting SARS-CoV-2 peptides for targeted studies from experimental data-dependent acquisition tandem mass spectrometry data. *Proteomics* **2020**, *20*, 2000107.

Grenga, L.; Gallais, F.; Pible, O.; Gaillard, J.C.; Gouveia, D.; Batina, H.; Bazaline, N.; Ruat, S.; Culotta, K.; Miotello, G. et al. Shotgun proteomics analysis of SARS-CoV-2-infected cells and how it can optimize whole viral particle antigen production for vaccines. *Emerg. Microb. Inf.* **2020**, *9*, 1712-1721.

Ihling, C.; Tanzler, D.; Hagemann, S.; Kehlen, A.; Huttelmaier, S.; Arlt, C.; Sinz, A. Mass spectrometric Identification of SARS-CoV-2 proteins from gargle solution samples of COVID-19 patients. *J. Proteom. Res.* **2020**, *19*, 4389-4392.

Klann, K.; Bojkova, D.; Tascher, G.; Ciesek, S.; Munch, C.; Cinatl, J. Growth factor receptor signaling inhibition prevents SARS-CoV-2 replication. *Mol. Cell* **2020**, *80*, 164-174.

Lee, J.S.; Han, D.; Kim, S.Y.; Hong, K.H.; Jang, M.J.; Kim, M.J.; Kim, Y.G.; Park, J.H.; Cho, S.I.; Park, W.B. et al. Longitudinal proteomic profiling provides insights into host response and proteome dynamics in COVID-19 progression. *Proteomics* **2021**, doi: 10.1002/pmic.202000278.

Leng, L.; Cao, R.Y.; Ma, J.; Mou, D.L.; Zhu, Y.P.; Li, W.; Lv, L.Y.; Gao, D.Q.; Zhang, S.K.; Gong, F. et al. Pathological features of COVID-19-associated lung injury: a preliminary proteomics report based on clinical samples. *Signal Transduct. Targ. Ther.* **2020**, *5*, 240.

Li, C.; Revote, J.; Ramarathinam, S.H.; Chung, S.Z.; Croft, N.P.; Scull, K.E.; Huang, Z.Y.; Ayala, R.; Braun, A.; Mifsud, N.A. et al. Resourcing, annotating, and analysing synthetic peptides of SARS-CoV-2 for immunopeptidomics and other immunological studies. *Proteomics* **2021**, in press. doi: 10.1002/pmic.202100036.

Li, J.; Guo, M.; Tian, X.; Wang, X.; Yang, X.; Wu, P.; Liu, C.; Xiao, Z.; Qu, Y.; Yin, Y. et al. Virus-host interactome and proteomic survey reveal potential virulence factors influencing SARS-CoV-2 pathogenesis. *Med (N.Y.)* **2021**, *2*, 99-112.

Messner, C.B.; Demichev, V.; Wendisch, D.; Michalick, L.; White, M.; Freiwald, A.; Textoris-Taube, K.; Vernardis, S.I.; Egger, A.S.; Kreidl, M. et al. Ultra-high-throughput clinical proteomics reveals classifiers of COVID-19 infection. *Cell Syst.* **2020**, *11*, 11-24.e4.

Nie, X.; Qian, L.J.; Sun, R.; Huang, B.; Dong, X.C.; Xiao, Q.; Zhang, Q.S.; Lu, T.; Yue, L.; Chen, S. et al. Multi-organ proteomic landscape of COVID-19 autopsies. *Cell* **2021**, *184*, 775-761.e14.

Park, J.; Kim, H.; Kim, S.Y.; Kim, Y.; Lee, J.S.; Dan, K.; Seong, M.W.; Han, D. In-depth blood proteome profiling analysis revealed distinct functional characteristics of plasma proteins between severe and non-severe COVID-19 patients. *Scient. Rep.* **2020**, *10*, 22418.

Saadi, J.; Oueslati, S.; Bellanger, L.; Gallais, F.; Dortet, L.; Roque-Afonso, A.M.; Junot, C.; Naas, T.; Fenaille, F.; Beche, F. Quantitative assessment of SARS-CoV-2 virus in nasopharyngeal swabs stored in transport medium by a straightforward LC-MS/MS assay targeting nucleocapsid, membrane, and spike proteins. *J. Proteome Res.* **2021**, *20*, 1434-1443.

Schmidt, N.; Lareau, C.A.; Keshishian, H.; Ganskih, S.; Schneider, C.; Hennig, T.; Melanson, R.; Werner, S.; Wei, Y.J.; Zimmer, M. et al. The SARS-CoV-2 RNA-protein interactome in infected human cells. *Nat. Microbiol.* **2021**, *6*, 339-353.

Shen, B.; Yi, X.; Sun, Y.T.; Bi, X.J.; Du, J.P.; Zhang, C.; Quan, S.; Zhang, F.F.; Sun, R.; Qian, L.J. et al. Proteomic and metabolomic characterization of COVID-19 patient sera. *Cell* **2020**, *182*, 59-64.

Shu, T.; Ning, W.S.; Wu, D.; Xu, J.Q.; Han, Q.Q.; Huang, M.H.; Zou, X.J.; Yang, Q.Y.; Yuan, Y.; Bie, Y.Y. et al. Plasma proteomics identify biomarkers and pathogenesis of COVID-19. *Immunity* **2020**, *53*, 1108-1122.

- Sims, J.T.; Krishnan, V.; Chang, C.Y.; Engle, S.M.; Casalini, G.; Rodgers, G.H.; Bivi, N.; Nickoloff, B.J.; Konrad, R.J.; de Bono, S. et al. Characterization of the cytokine storm reflects hyperinflammatory endothelial dysfunction in COVID-19. *J. Allerg. Clin. Immunol.* **2021**, *147*, 107-111.
- Stukalov, A.; Girault, V.; Grass, V.; Karayel, O.; Bergant, V.; Urban, C.; Haas, D.A.; Huang, Y.; Oubraham, L.; Wang, A. et al. Multilevel proteomics reveals host perturbations by SARS-CoV-2 and SARS-CoV. *Nature* **2021**, *594*, 246-252.
- Suvarna, K.; Biswas, D.; Pai, M.G.J.; Acharjee, A.; Bankar, R.; Palanivel, V.; Salkar, A.; Verma, A.; Mukherjee, A.; Choudhury, M. et al. Proteomics and machine learning approaches reveal a set of prognostic markers for COVID-19 severity with drug repurposing potential. *Fr. Physiol.* **2021**, *12*, 652799.
- Tushir, S.; Kamanna, S.; Nath, S.S.; Bhat, A.; Rose, S.; Aithal, A.R.; Tatu, U. Proteo-genomic analysis of SARS-CoV-2: a clinical landscape of single-nucleotide polymorphisms, COVID-19 proteome, and host responses. *J. Prot. Res.* **2021**, *20*, 1591-1601.
- Van Puyvelde, B.; Van Uytenghe, K.; Tytgat, O.; Van Oudenhove, L.; Gabriels, R.; Bouwmeester, R.; Daled, S.; Van Den Bossche, T.; Ramasamy, P.; Verhelst, S. et al. Cov-MS: a community-based template assay for mass-spectrometry-based protein detection in SARS-CoV-2 patients. *J. Am. Chem. Soc.* **2021**, in press. doi: /10.1021/jacsau.1c00048.
- Wendt, R.; Kalbitz, S.; Lubbert, C.; Kellner, N.; Macholz, M.; Schroth, S.; Ermisch, J.; Latosisnka, A.; Arnold, B.; Mischak, H. et al. Urinary peptides significantly associate with COVID-19 severity: pilot proof-of-principle data and design of a multicentric diagnostic study. *Proteomics* **2020**, *20*, 2000202.
- Wu, M.; Chen, Y.B.; Xia, H.; Wang, C.L.; Tan, C.Y.; Cai, X.H.; Liu, Y.F.; Ji, F.H.; Xiong, P.; Liu, R. et al. Transcriptional and proteomic insights into the host response in fatal COVID-19 cases. *Proc. Nat. Acad. Sci. USA* **2020**, *117*, 28336-28343.
- Yarmarkovich, M.; Warrington, J.M.; Farrel, A.; Maris, J.M. Identification of SARS-CoV-2 vaccine epitopes predicted to induce long-term population-scale immunity. *Cell Rep. Med.* **2020**, *1*, 100036.
- Zeng, H.L.; Chen, D.; Yan, J.J.; Yang, Q.; Han, Q.Q.; Li, S.S.; Cheng, L.M. Proteomic characteristics of bronchoalveolar lavage fluid in critical COVID-19 patients. *FEBS J.* **2021**, in press. doi: 10.1111/febs.15609.
- Zhang, C.; Zheng, W.; Huang, X.; Bell, E.W.; Zhou, X.; Zhang, Y. Protein structure and sequence reanalysis of 2019-nCoV genome refutes snakes as its intermediate host and the unique similarity between its spike protein insertions and HIV-1. *J. Proteome Res.* **2020**, *19*, 1351-1360.

**Table S3.** Proteomics studies of antibiotic resistance, which were performed in animal samples, reviewed in the text of the paper.

| Bacterial pathogens                                   | Proteomics methodologies applied <sup>1</sup> | Summary of main findings                                                                                                                                                                                                                                    | Reference            |
|-------------------------------------------------------|-----------------------------------------------|-------------------------------------------------------------------------------------------------------------------------------------------------------------------------------------------------------------------------------------------------------------|----------------------|
| <i>Campylobacter jejuni</i>                           | LC-MS/MS                                      | New mechanism regarding rRNA methylation by a radical SAM super-family enzyme, leading to resistance to chloramphenicol                                                                                                                                     | Li et al. 2017       |
| <i>Salmonella enterica</i> serovar <i>Enteritidis</i> | 2D-DIGE, MALDI-TOF MS                         | Changes of specific regulators of post-translational dynamics in resistant lineages decreased metabolic strain on cell walls and enhanced the stability of the periplasmic envelop – resistance to ceftiofur                                                | Radford et al. 2018  |
| <i>Salmonella enterica</i> serovar <i>Typhimurium</i> | 1-DE SDS-PAGE, 2-DIGE, MALDI TOF/TOF MS       | Elucidation of mechanisms of mechanisms of response to triclosan                                                                                                                                                                                            | Condell et al. 2012  |
| <i>Salmonella enterica</i> serovar <i>Typhimurium</i> | 2-DE, MALDI-TOF MS                            | Detection of three proteins related to antimicrobial resistance to fluoroquinolones                                                                                                                                                                         | Correia et al. 2014  |
| <i>Salmonella enterica</i> serovar <i>Typhimurium</i> | LC-MS/MS                                      | Identification of one post-translational modification, lysine acetylation, and of 14 differentially expressed proteins related to antimicrobial resistance                                                                                                  | Li et al. 2018       |
| <i>Escherichia coli</i>                               | 2-DE, MALDI-TOF MS, nano HPLC-MS/MS           | Identification of differentially expressed proteins under multi drug resistance conditions, highlighting mechanisms involved in resistance (e.g., quorum sensing-mechanisms)                                                                                | Piras et al. 2012    |
| <i>Escherichia coli</i>                               | 2-DE, MALDI-TOF MS                            | Upregulation of outer membrane proteins TolC, Tsx and OstA and downregulation of outer membrane proteins MipA, OmpA, FadL and OmpW were found to be downregulated in kanamycin-resistant isolates of the organism                                           | Li et al. 2015       |
| <i>Escherichia coli</i>                               | 2-DIGE, MALDI-TOF/TOF MS, nano LC-MS          | Differential expression of proteins linked to oxidative stress response, to DNA protection and to membrane permeability in enrofloxacin-resistant isolates of the organism                                                                                  | Piras et al. 2015    |
| <i>Escherichia coli</i>                               | 2-DE, MALDI-TOF/TOF MS                        | Overexpression of hydrolase L-asparaginase in a ciprofloxacin-resistant isolate of the organism                                                                                                                                                             | Ramos et al. 2016    |
| <i>Mannheimia haemolytica</i>                         | 2-DE, LC/ESI-MS                               | Administration of chlortetracycline and/or sulfamethazine decreased the expression of leucotoxin                                                                                                                                                            | Nanduri et al. 2005  |
| <i>Staphylococcus aureus</i>                          | 2-DE, MALDI-TOF MS                            | Production of a reproducible and well-resolved reference map of the surface proteins of the organism                                                                                                                                                        | Taverna et al. 2007  |
| <i>Staphylococcus aureus</i>                          | 2-DE, MALDI-TOF/TOF MS                        | Detection of proteins with specific functions (e.g., catalase, superoxide dismutase) found in resistant isolates, indicating that these proteins can protect intraphagocytic bacteria by potentially destroying hydrogen peroxide produced by the phagocyte | Monteiro et al. 2012 |

|                              |                |                                                                                                                                                                                    |                     |
|------------------------------|----------------|------------------------------------------------------------------------------------------------------------------------------------------------------------------------------------|---------------------|
| <i>Staphylococcus aureus</i> | LC-MS          | Detection of 200 differentially expressed proteins in erythromycin and/or oxacillin-resistant isolates of the organism, which can provide new therapeutic approaches for mastitis. | Liu et al. 2016     |
| <i>Staphylococcus aureus</i> | 2-DE, LC-MS/MS | Elucidation of mechanisms involved in development of resistance to methicillin by isolates of the organism                                                                         | Igrejas et al. 2018 |
| <i>Streptococcus</i> spp.    | LC-ESI MS/MS   | Identification of 134 peptides associated with resistance to antimicrobial agents                                                                                                  | Abril et al. 2020   |

<sup>1</sup> 1-DE SDS-PAGE: One-Dimensional Electrophoresis Sodium Dodecyl Sulphate–PolyAcrylamide Gel Electrophoresis; 2-DE: Two-Dimensional Electrophoresis; 2-DIGE: Two-Dimensional Difference Gel Electrophoresis; HPLC-MS/MS: High Pressure Liquid Chromatography-Mass Spectrometry/Mass Spectrometry; LC-ESI MS/MS: Liquid Chromatography-ElectroSpray Ionization Mass Spectrometry/Mass Spectrometry; LC-MS: Liquid Chromatography-Mass Spectrometry; LC-MS/MS: Liquid Chromatography-Mass Spectrometry/Mass Spectrometry; MALDI TOF: Matrix-Assisted Laser Desorption/Ionization – Time Of Flight; MALDI TOF/TOF: Matrix-Assisted Laser Desorption/Ionization – Time Of Flight/Time Of Flight; MS: Mass Spectrometry.

## References

- Abril, A.G.; Carrera, M.; Böhme, K.; Barros-Velázquez, J.; Rama, J. R.; Calo-Mata, P.; Sánchez-Pérez, A.; Villa, T.G. Proteomic characterization of antibiotic resistance, and production of antimicrobial and virulence factors in *Streptococcus* species associated with bovine mastitis. Could enzybiotics represent novel therapeutic agents against these pathogens? *Antibiotics (Basel)* **2020**, *9*, 302.
- Condell, O.; Sheridan, Á.; Power, K.A.; Bonilla-Santiago, R.; Sergeant, K.; Renaut, J.; Burgess, C.; Fanning, S.; Nally, J.E. Comparative proteomic analysis of *Salmonella* tolerance to the biocide active agent triclosan. *J. Proteom.* **2012**, *75*, 4505–4519.
- Correia, S.; Nunes-Miranda, J.D.; Pinto, L.; Santos, H.M.; de Toro, M.; Sáenz, Y.; Torres, C.; Capelo, J. L.; Poeta, P.; Igrejas, G. Complete proteome of a quinolone-resistant *Salmonella* Typhimurium phage type DT104B clinical strain. *Int. J. Mol. Sci.* **2014**, *15*, 14191–14219.
- Igrejas, G.; Correia, S.; Silva, V.; Hébraud, M.; Caniça, M.; Torres, C.; Gomes, C.; Nogueira, F.; Poeta, P. Planning a one health case study to evaluate methicillin resistant *Staphylococcus aureus* and its economic burden in Portugal. *Fr. Microbiol.* **2018**, *9*, 2964.
- Li, H.; Wang, Y.; Fu, Q.; Wang, Y.; Li, X.; Wu, C.; Shen, Z.; Zhang, Q.; Qin, P.; Shen, J.; Xia, X. Integrated genomic and proteomic analyses of high-level chloramphenicol resistance in *Campylobacter jejuni*. *Sci. Rep.* **2017**, *7*, 16973.
- Li, L.; Wang, W.; Zhang, R.; Xu, J.; Wang, R.; Wang, L.; Zhao, X.; Li, J. First acetyl-proteome profiling of *Salmonella typhimurium* revealed involvement of lysine acetylation in drug resistance. *Vet. Microbiol.* **2018**, *226*, 1–8.
- Li, H.; Zhang, D.F.; Lin, X. M.; Peng, X.X. Outer membrane proteomics of kanamycin-resistant *Escherichia coli* identified *MipA* as a novel antibiotic resistance-related protein. *FEMS Microbiol. Lett.* **2015**, *362*, fnv074.
- Liu, X.; Pai, P. J.; Zhang, W.; Hu, Y.; Dong, X.; Qian, P. Y.; Chen, D.; Lam, H. Proteomic response of methicillin-resistant *S. aureus* to a synergistic antibacterial drug combination: a novel erythromycin derivative and oxacillin. *Sci. Rep.* **2016**, *6*, 19841.
- Monteiro, R.; Vitorino, R.; Domingues, P.; Radhouani, H.; Carvalho, C.; Poeta, P.; Torres, C.; Igrejas, G. Proteome of a methicillin-resistant *Staphylococcus aureus* clinical strain of sequence type ST398. *J. Proteom.* **2012**, *75*, 2892–2915.
- Nanduri, B.; Lawrence, M.L.; Vanguri, S.; Pechan, T.; Burgess, S.C. Proteomic analysis using an unfinished bacterial genome: the effects of subminimum inhibitory concentrations of antibiotics on *Mannheimia haemolytica* virulence factor expression. *Proteomics* **2005**, *5*, 4852–4863.
- Piras, C.; Soggiu, A.; Bonizzi, L.; Gaviraghi, A.; Deriu, F.; De Martino, L.; Iovane, G.; Amoresano, A.; Roncada, P. Comparative proteomics to evaluate multi drug resistance in *Escherichia coli*. *Mol. Biosyst.* **2012**, *8*, 1060–1067.

- Piras, C; Soggiu, A.; Greco, V.; Martino, P.A.; Del Chierico, F.; Putignani, L.; Urbani, A.; Nally, J.E.; Bonizzi, L.; Roncada, P. Mechanisms of antibiotic resistance to enrofloxacin in uropathogenic *Escherichia coli* in dog. *J. Proteom.* **2015**, *127*, 365-376.
- Radford, D.; Strange, P.; Lepp, D.; Hernandez, M.; Rehman, M.A.; Diarra, M.S.; Balamurugan, S. Genomic and proteomic analyses of *Salmonella enterica* serovar Enteritidis identifying mechanisms of induced *de novo* tolerance to ceftiofur. *Fr. Microbiol.* **2018**, *9*, 2123.
- Ramos, S.; Chafsey, I.; Hebraud, M.; Sousa, M.; Poeta, P.; Igrejas, G. Ciprofloxacin stress proteome of the extended-spectrum beta-lactamase producing *Escherichia coli* from slaughtered pigs. *Curr. Proteom.* **2016**, *13*, 285.
- Taverna, F.; Negri, A.; Piccinini, R.; Zecconi, A.; Nonnis, S.; Ronchi, S.; Tedeschi, G. Characterization of cell wall associated proteins of a *Staphylococcus aureus* isolated from bovine mastitis case by a proteomic approach. *Vet. Microbiol.* **2007**, *119*, 240–247.

**Table S4.** Proteomics studies, which were performed in samples of food of animal origin, reviewed in the text of the paper.

| Type of sample                                | Proteomics methodologies applied <sup>1</sup> | Summary of main findings                                                                                                                                                                         | Reference                |
|-----------------------------------------------|-----------------------------------------------|--------------------------------------------------------------------------------------------------------------------------------------------------------------------------------------------------|--------------------------|
| Meat samples from cattle                      | MALDI-TOF MS                                  | Quick species-level identification of bacteria was achieved within 18 to 30 h after collection of the samples, by means of identifying specific biomarkers                                       | Jadhav et al. 2018       |
| Muscle and adipose tissue samples from cattle | LC MS                                         | Identification of changes in 245 proteins, associated with growth of muscle and related to increase in number and volume of muscular and adipose cells, as potential biomarkers for meat quality | Bonnet et al. 2013       |
| Processed meat samples from cattle            | MALDI-TOF MS                                  | Exclusive increase of <i>Enterococcus</i> genus bacteria, allowing to distinguish the organism from other species of the genus                                                                   | Sabença et al. 2020      |
| Muscle samples from pigs                      | LC-MS                                         | Increased rate of the pentose phosphate pathway in pigs                                                                                                                                          | Marrocco et al. 2013     |
| Muscle samples from pigs                      | 2-DIGE, MS                                    | Detection of 16 proteins associated with differences related to two animal phenotypes divergent for water holding capacity                                                                       | Di Luca et al. 2013      |
| Central nervous system samples from pigs      | 2-DE                                          | Identification of protein changes according to pre-slaughter handling stress of animals                                                                                                          | Arroyo et al. 2013       |
| Muscle samples from sheep                     | 2-DE, MALDI-TOF MS                            | Identification of chaperone proteins more highly expressed, due to increased use of energetic pathways                                                                                           | Hamelin et al. 2006      |
| Carcass samples from hares                    | LC-MS/MS                                      | Development of a technique for detection of <i>Francisella tularensis</i> in food supplies                                                                                                       | Witt et al. 2020         |
| Chicken meat products                         | LC-MS/MS                                      | Development of a technique for detection and quantification of staphylococcal enterotoxin B                                                                                                      | Bao et al. 2012          |
| Edible aquatic products <sup>2</sup>          | 2-DE, LC-MS/MS                                | Proteomic profile of <i>Vibrio parahaemolyticus</i> from consumable aquatic products                                                                                                             | Zhu et al. 2020          |
| Fish <sup>3</sup>                             | LC-MS/MS                                      | Development of a technique for detection of $\beta$ -parvalbumin                                                                                                                                 | Carrera et al. 2012      |
| Black tiger prawns                            | SDS-PAGE, MALDI-Q ToF MS, ESI Q ToF MS        | Proteomics profiling of the allergen tropomyosin                                                                                                                                                 | Abdel Rahman et al. 2010 |
| Blue mussels                                  | LC-MS                                         | Identification of proteins indicative of pre-harvest contamination                                                                                                                               | Tedesco et al. 2013      |
| Blue mussels                                  | nano-LC-ESI MS/MS, MALDI-TOF/TOF/MS           | Development of processes for depuration of shellfish contaminated with azaspiracid toxins                                                                                                        | Nzougnet et al. 2008     |
| Parma dry-cured ham                           | 2-DE, LC-MS/MS                                | Identification of proteins differentially abundant in pressed or unpressed hams                                                                                                                  | Paredi et al. 2017       |
| Cow milk                                      | nano LC-MS/MS                                 | Detection of redox and non-redox protein modifications according to oxidative damage in milk products                                                                                            | Clerens et al. 2013      |
| Cow milk                                      | LC-MS/MS                                      | Development of a technique for detection and quantification of ricin, staphylococcal enterotoxin B and <i>Clostridium perfringens</i> epsilon toxin                                              | Dupré et al. 2015        |

|                               |                    |                                                                                                                                                                             |                                    |
|-------------------------------|--------------------|-----------------------------------------------------------------------------------------------------------------------------------------------------------------------------|------------------------------------|
| Cow milk                      | LC-MS/MS           | Development of a technique for detection of staphylococcal enterotoxin A and staphylococcal enterotoxin B                                                                   | Andjelkovic et al. 2016            |
| Cow milk, Goat milk           | nano LC-MS/MS.     | Development of a technique for detection of milk adulteration.                                                                                                              | Nardiello et al. 2018              |
| ‘Grana Padano’ cheese         | LC-MS/MS           | Identification of proteins characterising the stages of ripening and the milk treatment                                                                                     | Soggiu et al. 2013                 |
| Feta cheese                   | LC-MS/MS           | Identification of 489 distinct single-gene products characterizing the product                                                                                              | Anagnostopoulos and Tsangaris 2018 |
| Eggs                          | 2-DE, Q-TOF MS     | Identification of proteins (ovalbumin, clusterin, ovoinhibitor, ovotransferrin, prostaglandin D2 synthase) that showed significant changes in abundance during eggs storage | Omana et al. 2011                  |
| Royal jelly                   | 2-DE, MALDI-TOF MS | Description of the proteome of royal jelly                                                                                                                                  | Scarselli et al. 2005              |
| Seafood products <sup>4</sup> | LC-MS/MS           | Development of a technique for detection of $\beta$ -parvalbumin                                                                                                            | Carrera et al. 2012                |
| Drinking water                | LC-MS/MS           | Development of a technique for detection and quantification of ricin, staphylococcal enterotoxin B and <i>Clostridium perfringens</i> epsilon toxin                         | Dupré et al. 2015                  |

<sup>1</sup> 2-DE: Two-Dimensional Electrophoresis; 2-DIGE: Two-Dimensional Difference Gel Electrophoresis; ESI Q ToF MS: ElectroSpray Quadrupole-Time Of Flight Mass Spectrometry; LC-MS: Liquid Chromatography-Mass Spectrometry; LC-MS/MS: Liquid Chromatography-Mass Spectrometry/Mass Spectrometry; MS: Mass Spectrometry.

<sup>2</sup> *Aristichthys nobilis*, *Ctenopharyngodon idellus*, *Litopenaeus vannamei*, *Macraa veneriformis*, *Oratosquilla oratoria*, *Ostrea gigas* Thunberg, *Paphia undulate*, *Perna viridis*, *Placopecten magellanicus*, *Ruditapes philippinarum*, *Sinonovacula constricta*, *Solen strictus*,.

<sup>3</sup> Angler, Austral hake, Club mackerel, Common seabream, Common sole, Deep-cape hake, Cod, Four-spot megrim, Gilthead seabream, Horse mackerel, Pink cusk-eel, Ray’s breem, Salmon, Swordfish, White seabream, Yellowfin tuna.

<sup>4</sup> Cod fillets, frozen surimi, seafood with angler, seafood with hake, seafood with sole.

## References

- Abdel Rahman, A.M.; Kamath, S.; Lopata, A.L.; Helleur, R.J. Analysis of the allergenic proteins in black tiger prawn (*Penaeus monodon*) and characterization of the major allergen tropomyosin using mass spectrometry. *Rapid Commun. Mass Spectrom.* **2010**, *24*, 2462–2470.
- Anagnostopoulos, A.K.; Tsangaris, G.T. Feta cheese proteins: manifesting the identity of Greece’s national treasure. *Data Brief* **2018**, *19*, 2037–2040.
- Andjelkovic, M.; Tsilia, V.; Rajkovic, A.; De Cremer, K.; Van Loco, J. Application of LC-MS/MS MRM to determine staphylococcal enterotoxins (SEB and SEA) in milk. *Toxins* **2016**, *8*, 118.
- Arroyo, L.; Marco-Ramell, A.; Soler, M.; Pena, R.; Velarde, A.; Sabria, J.; Unzeta, M.; Bassols, A. Neurotransmitter levels and proteomic approach in pig brain: pre-slaughter handling stress and cognitive biases. In *Farm animal proteomics 2013*, Proceedings of the 4th Management Committee Meeting and 3rd Meeting of Working Groups 1, 2 & 3 of COST Action FA1002, Kosice, Slovakia, 25-26 April 2013; de Almeida A, Eckersall D, Bencurova E, Dolinska S, Mlynarcik P, Vincova M, Bhide MR, Eds.; Wageningen Academic Publishers: Wageningen, The Netherlands, 2013; pp. 192-195.
- Bao, K.D.; Letellier, A.; Beaudry, F. Analysis of *Staphylococcus* enterotoxin B using differential isotopic tags and liquid chromatography quadrupole ion trap mass spectrometry. *Biomed. Chromatogr.* **2012**, *26*, 1049–1057.
- Bonnet, M.; Kaspric N.; Picard, B. Quest for biomarkers of the lean-to-fat ratio by proteomics in beef production. In *Farm animal proteomics 2013*, Proceedings of the 4th Management Committee Meeting and 3rd Meeting of Working Groups 1, 2 & 3 of COST Action FA1002, Kosice, Slovakia, 25-26 April 2013; de Almeida A, Eckersall D, Bencurova E, Dolinska S, Mlynarcik P, Vincova M, Bhide MR, Eds.; Wageningen Academic Publishers: Wageningen, The Netherlands, 2013; pp. 43-44.
- Carrera, M.; Cañas, B.; Gallardo, J.M. Advanced proteomics and systems biology applied to study food allergy. *Curr. Opin. Food Sci.* **2018**, *22*, 9–16.

- Clerens, S.; Plowman, J.E.; Haines, S.; Dyer, J.M. A mass spectrometric scoring system for oxidative damage in dairy foods. In *Farm animal proteomics 2013*, Proceedings of the 4th Management Committee Meeting and 3rd Meeting of Working Groups 1, 2 & 3 of COST Action FA1002, Kosice, Slovakia, 25-26 April 2013; de Almeida A, Eckersall D, Bencurova E, Dolinska S, Mlynarcik P, Vincova M, Bhide MR, Eds.; Wageningen Academic Publishers: Wageningen, The Netherlands, 2013; pp. 255-257.
- Di Luca, A.; Elia, G.; Hamill, R.; Mullen, A.M. 2D DIGE proteomic analysis of early post mortem muscle exudate highlights the importance of the stress response for improved water-holding capacity of fresh pork meat. *Proteomics* **2013**, *13*, 1528–1544.
- Dupré, M.; Gilquin, B.; Fenaille, F.; Feraudet-Tarisse, C.; Dano, J.; Ferro, M.; Simon, S.; Junot, C.; Brun, V.; Becher, F. Multiplex quantification of protein toxins in human biofluids and food matrices using immunoextraction and high-resolution targeted mass spectrometry. *Anal. Chem.* **2015**, *87*, 8473–8480.
- Hamelin, M.; Sayd, T.; Chambon, C.; Bouix, J.; Bibé, B.; Milenkovic, D.; Leveziel, H.; Georges, M.; Clop, A.; Marinova, P.; Laville, E. Proteomic analysis of ovine muscle hypertrophy. *J. Anim. Sci.* **2006**, *84*, 3266–3276.
- Jadhav, S.R.; Shah, R.M.; Karpe, A.V.; Morrison, P.D.; Kouremenos, K.; Beale, D.J.; Palombo, E.A. Detection of foodborne pathogens using proteomics and metabolomics-based approaches. *Fr. Microbiol.* **2018**, *9*, 3132.
- Marrocco, C.; D'Alessandro, A.; Rinalducci, S.; Mirasole, C.; Zolla, L. Untargeted metabolomic analyses open new scenarios in post mortem pig muscles: Casertan and Large White. In *Farm animal proteomics 2013*, Proceedings of the 4th Management Committee Meeting and 3rd Meeting of Working Groups 1, 2 & 3 of COST Action FA1002, Kosice, Slovakia, 25-26 April 2013; de Almeida A, Eckersall D, Bencurova E, Dolinska S, Mlynarcik P, Vincova M, Bhide MR, Eds.; Wageningen Academic Publishers: Wageningen, The Netherlands, 2013; pp. 270-273.
- Nardiello, D.; Natale, A.; Palermo, C.; Quinto, M.; Centonze, D. Milk authenticity by ion-trap proteomics following multi-enzyme digestion. *Food Chem.* **2018**, *244*, 317–323.
- Nzoughet, K.J.; Hamilton, J.T.; Floyd, S.D.; Douglas, A.; Nelson, J.; Devine, L.; Elliott, C.T. Azaspiracid: first evidence of protein binding in shellfish. *Toxicon* **2008**, *51*, 1255–1263.
- Omana, D.A.; Liang, Y.; Kav, N.N.; Wu, J. Proteomic analysis of egg white proteins during storage. *Proteomics* **2011**, *11*, 144–153.
- Paredi, G.; Benoni, R.; Pighini, G.; Ronda, L.; Dowle, A.; Ashford, D.; Thomas, J.; Saccani, G.; Virgili, R.; Mozzarelli, A. Proteomics of Parma dry-cured ham: analysis of salting exudates. *J. Agric. Food Chem.* **2017**, *65*, 6307–6316.
- Sabença, C.; Sousa, T.; Oliveira, S.; Viala, D.; Théron, L.; Chambon, C.; Hébraud, M.; Beyrouthy, R.; Bonnet, R.; Caniça, M.; Poeta, P.; Igrejas, G. Next-generation sequencing and MALDI mass spectrometry in the study of multiresistant processed meat vancomycin-resistant enterococci (VRE). *Biology* **2020**, *9*, 89.
- Scarselli, R.; Donadio, E.; Giuffrida, M.G.; Fortunato, D.; Conti, A.; Balestreri, E.; Felicioli, R.; Pinzauti, M.; Sabatini, A.G.; Felicioli, A. Towards royal jelly proteome. *Proteomics* **2005**, *5*, 769–776.
- Soggiu, A.; Bendixen, E.; Brasca, M.; Morandi, S.; Piras, C.; Bonizzi, L.; Roncada, P. Milk and cheese microbiome for safety and quality of dairy products. In *Farm animal proteomics 2013*, Proceedings of the 4th Management Committee Meeting and 3rd Meeting of Working Groups 1, 2 & 3 of COST Action FA1002, Kosice, Slovakia, 25-26 April 2013; de Almeida A, Eckersall D, Bencurova E, Dolinska S, Mlynarcik P, Vincova M, Bhide MR, Eds.; Wageningen Academic Publishers: Wageningen, The Netherlands, 2013; pp. 262-265.
- Tedesco, S.; Mullen, W.; Mischak, H.; Bradshaw, C.; Cristobal, S. Shotgun proteomics in blue mussels exposed to benthic trawler-induced sediment resuspension from a polluted fjord. In *Farm animal proteomics 2013*, Proceedings of the 4th Management Committee Meeting and 3rd Meeting of Working Groups 1, 2 & 3 of COST Action FA1002, Kosice, Slovakia, 25-26 April 2013; de Almeida A, Eckersall D, Bencurova E, Dolinska S, Mlynarcik P, Vincova M, Bhide MR, Eds.; Wageningen Academic Publishers: Wageningen, The Netherlands, 2013; pp. 258-261.
- Witt, N.; Andreotti, S.; Busch, A.; Neubert, K.; Reinert, K.; Tomaso, H.; Meierhofer, D. Rapid and culture free identification of *Francisella* in hare carcasses by high-resolution tandem mass spectrometry proteotyping. *Fr. Microbiol.* **2020**, *11*, 636.
- Zhu, Z.; Yang, L.; Yu, P.; Wang, Y.; Peng, X.; Chen, L. Comparative proteomics and secretomics revealed virulence and antibiotic resistance-associated factors in *Vibrio parahaemolyticus* recovered from commonly consumed aquatic products. *Fr. Microbiol.* **2020**, *11*, 1453.

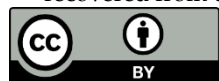

Supplement: s1 [file s1]
